# Supplementary material for: Speciation and determination of inorganic arsenic species in water and biological samples by ultrasound assisted-dispersive-micro-solid phase extraction on carboxylated nanoporous graphene coupled with flow injection-hydride generation atomic absorption spectrometry
Source: Royal Society of Chemistry journal article supplement (doi:10.1039/c5ra17229b), 2015-01-01
Supplement: c5ra17229b1.pdf [file c5ra17229b1.pdf]

## Electronic Supplementary Information (ESI)

### **Speciation and determination of inorganic arsenic species in water and biological samples by ultrasound assisted-dispersive-micro-solid phase extraction on carboxylated nanoporous graphene coupled with flow injection-hydride generation atomic absorption spectrometry**

Aisan Khaligh<sup>a</sup>, Hamid Shirkhanloo<sup>b,c</sup>, Hassan Zavvar Mousavi<sup>a,1</sup>, Alimorad Rashidi<sup>c</sup>

<sup>a</sup> *Department of Chemistry, Semnan University, Semnan 35131-1911, Iran.*

<sup>b</sup> *Occupational and Environmental Health Research Center (OEHRC), Iranian Petroleum Industry Health Research Institute (IPIHRI), Tehran 1485733111, Iran.*

<sup>c</sup> *Nanotechnology Research Center, Research Institute of Petroleum Industry, Tehran 1485733111, Iran.*

---

<sup>1</sup>Corresponding author at: Department of Chemistry, Semnan University, Semnan 35131-1911, Iran.  
E-mail address: [hzmousavi@semnan.ac.ir](mailto:hzmousavi@semnan.ac.ir), Tel.: +98 23 3366194; Fax: +98 23 3354110

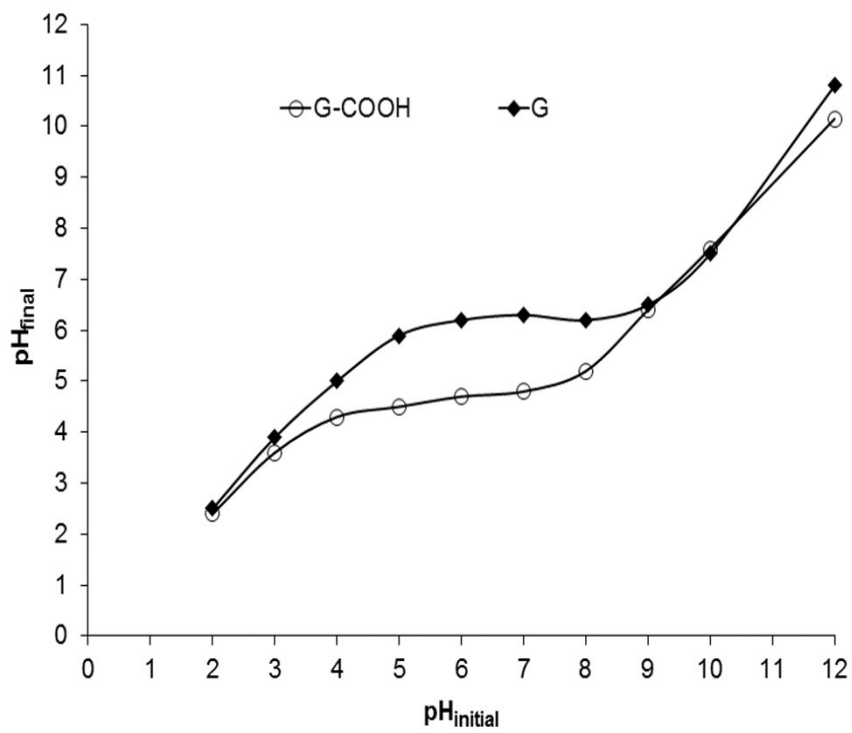

**Fig. S1** Final pH versus initial pH plots for 0.15 g of pristine and carboxylated nanoporous graphene.

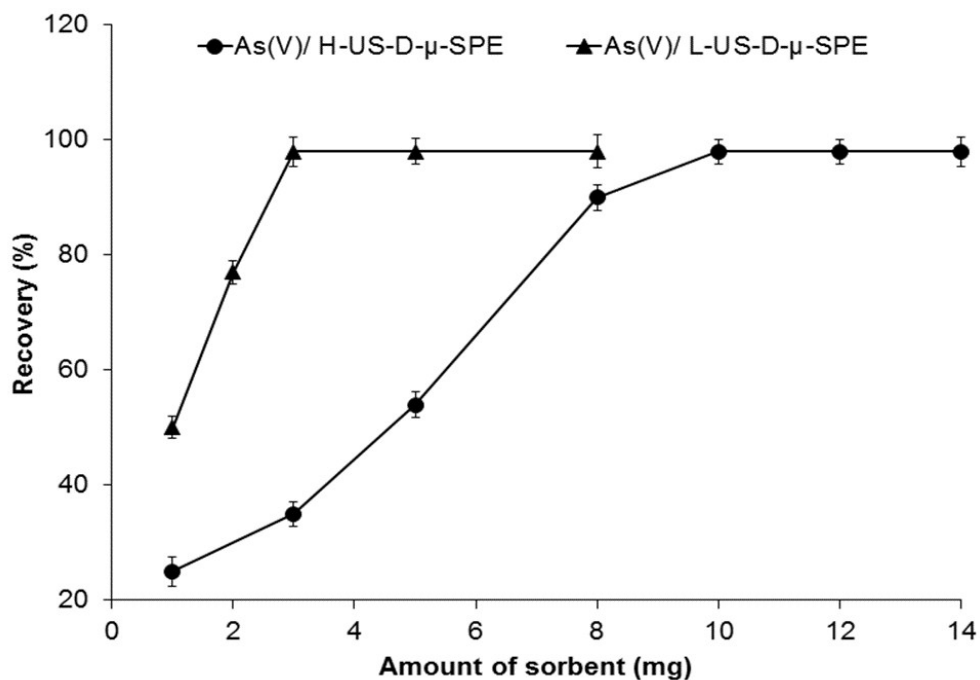

**Fig. S2** Effect of amount of adsorbent on the recovery of  $0.5 \mu\text{g L}^{-1}$  of As (V) ions. Conditions. solution pH 3.5; (a) H-US-D- $\mu$ -SPE: sample volume 50 mL; eluent 1000  $\mu\text{L}$  of  $0.5 \text{ mol L}^{-1}$  NaOH; extraction time 3 min. (b) L-US-D- $\mu$ -SPE: sample volume 5 mL; eluent 1000  $\mu\text{L}$  of  $0.3 \text{ mol L}^{-1}$  NaOH; extraction time 1 min.

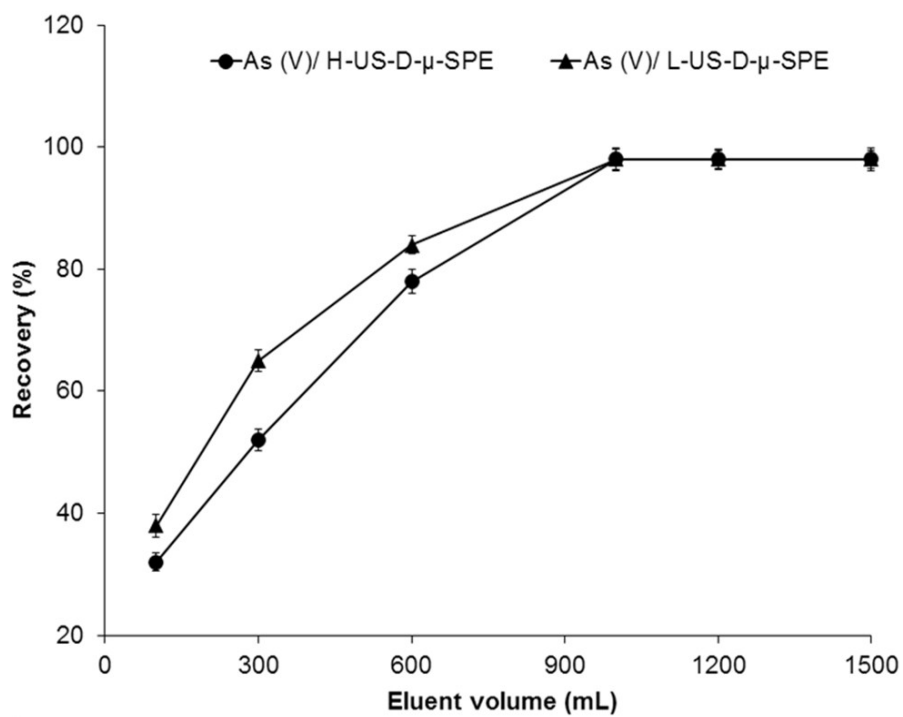

**Fig. S3** Effect of eluent volume on the recovery of  $0.5 \mu\text{g L}^{-1}$  of As (V) ions. Conditions. solution pH 3.5; (a) H-US-D- $\mu$ -SPE: sample volume 50 mL, sorbent 10 mg; eluent  $0.5 \text{ mol L}^{-1}$  NaOH; extraction time 3 min. (b) L-US-D- $\mu$ -SPE: sample volume 5 mL; sorbent 3 mg; eluent  $0.3 \text{ mol L}^{-1}$  NaOH; extraction time 1 min.

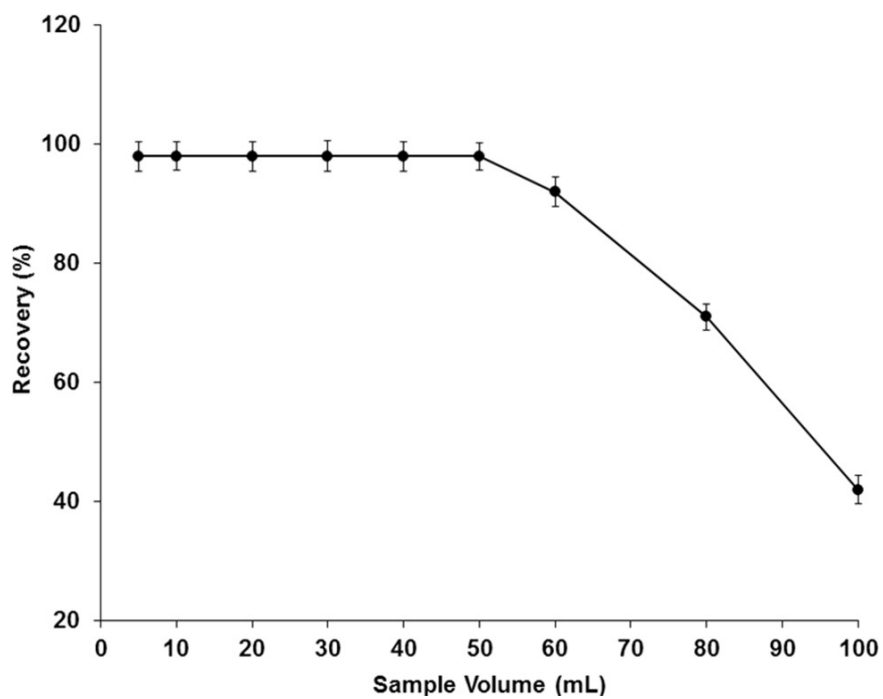

**Fig. S4** Effect of sample volume on the recovery of 0.025  $\mu\text{g}$  of As (V) ions. Conditions: solution pH 3.5; sorbent 10 mg; eluent 1000  $\mu\text{L}$  of 0.5 mol  $\text{L}^{-1}$  NaOH; extraction time 3 min.

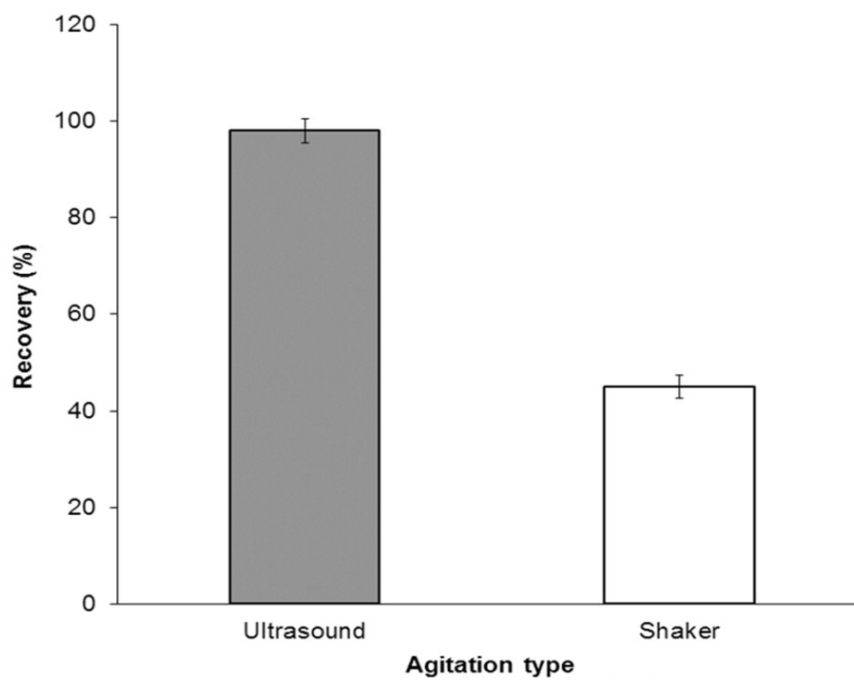

**Fig. S5** Effect of agitation type on the recovery of  $0.5 \mu\text{g L}^{-1}$  of As (V) ions. Conditions: sample volume 50 mL; solution pH 3.5; sorbent 10 mg; eluent 1000  $\mu\text{L}$  of  $0.5 \text{ mol L}^{-1}$  NaOH; extraction time 3 min.

**Table S1** The FI-HG-AAS conditions for arsenic determination.

| Features                                  | Value                  |
|-------------------------------------------|------------------------|
| Linear range, $\mu\text{g L}^{-1}$        | 0.5–30                 |
| Correlation coefficient                   | 0.9988                 |
| Wavelength, nm                            | 197.2                  |
| Lamp current, mA                          | 8.0                    |
| Slit, nm                                  | 1.0                    |
| Mode                                      | Peak Area              |
| HCl carrier solution, % (v/v)             | 5.0                    |
| $\text{NaBH}_4$ reducing agent, % (m/v)   | 0.6 (in 0.5% w/v NaOH) |
| Argon flow rate, $\text{mL min}^{-1}$     | 10                     |
| Air flow rate, $\text{mL min}^{-1}$       | 4.7                    |
| Acetylene flow rate, $\text{mL min}^{-1}$ | 1.2                    |

**Table S2** Comparison of the adsorption capacities of various adsorbents for removal of As (V) ions from water samples by batch method.

| Metal ions       | Adsorbent                                                                        | Adsorption capacity<br>(mg g <sup>-1</sup> ) |        | Ref.      |
|------------------|----------------------------------------------------------------------------------|----------------------------------------------|--------|-----------|
|                  |                                                                                  | As (III)                                     | As (V) |           |
| As (V)           | GO <sup>a</sup> /ferric hydroxide                                                | -----                                        | 23.78  | 63        |
| As (V)           | GO                                                                               | -----                                        | 59.60  | 64        |
| As (V)           | Magnetic GO                                                                      | -----                                        | 80.10  | 64        |
| As (III), As (V) | GO–ZrO(OH) <sub>2</sub>                                                          | 95.15                                        | 84.89  | 65        |
| As (III), As (V) | NZVI <sup>b</sup> –RGO <sup>c</sup> composite                                    | 35.83                                        | 29.04  | 66        |
| As (III), As (V) | Fe <sub>3</sub> O <sub>4</sub> –RGO <sup>c</sup> –MnO <sub>2</sub> nanoparticles | 14.04                                        | 12.22  | 67        |
| As (III), As (V) | Cu doped Fe <sub>3</sub> O <sub>4</sub>                                          | 37.97                                        | 42.90  | 68        |
| As (V)           | Fe <sub>3</sub> O <sub>4</sub> -loaded activated carbon                          | -----                                        | 43.70  | 69        |
| As (V)           | Iron-treated clinoptilolite                                                      | -----                                        | 30.21  | 70        |
| As (V)           | Mn <sub>3</sub> O <sub>4</sub> crystalline powder                                | -----                                        | 0.35   | 71        |
| As (V)           | surfactant-modified zeolite                                                      | -----                                        | 74.30  | 72        |
| As (V)           | Fe <sup>2+</sup> oxide coated ethylenediamine-MWCNT <sup>d</sup>                 | -----                                        | 17.80  | 73        |
| As (V)           | Granular TiO <sub>2</sub>                                                        | -----                                        | 41.40  | 74        |
| As (V)           | Carboxylated nanoporous graphene                                                 | -----                                        | 125.40 | This work |
| As (V)           | Nanoporous graphene                                                              | -----                                        | 35.00  | This work |

<sup>a</sup>Graphene oxide, <sup>b</sup>Nanoscale zero valent iron, <sup>c</sup> Reduced graphite oxide.



**Table S2.** Comparison of the developed US-D- $\mu$ -SPE methods with other reported procedures for determination of As ions in different matrixes.

| Species                                | Method/ Detection                               | Sorbent                                                     | Matrix                     | PF <sup>a</sup> | LOD <sup>b</sup><br>( $\mu\text{g L}^{-1}$ ) | R.S.D <sup>c</sup><br>(%) | Linear range<br>( $\mu\text{g L}^{-1}$ ) | Loading<br>time (min) | Sample<br>volume (mL) | Ref. |
|----------------------------------------|-------------------------------------------------|-------------------------------------------------------------|----------------------------|-----------------|----------------------------------------------|---------------------------|------------------------------------------|-----------------------|-----------------------|------|
| As(V), As(III)<br>converted to As(V)   | SPE <sup>d</sup> / HG-AAS <sup>e</sup>          | Nano ZrO <sub>2</sub> /B <sub>2</sub> O <sub>3</sub>        | Water                      | 20              | 0.185                                        | -----                     | 0.03–40                                  | 33                    | 100                   | 9    |
| As(V), As(III)<br>converted to As(V)   | SPE/ Molybdenum blue                            | CTAB@ACMNPs <sup>f</sup>                                    | Water                      | 175             | 0.028 $\text{mg L}^{-1}$                     | 2.8                       | 0.09–4.0                                 | -----                 | 350                   | 19   |
| As(V), As(III)<br>converted to As(V)   | Online-microcolumn<br>SPE/ ICP-OES <sup>g</sup> | CTAB-alkyl silica                                           | Water                      | 27.6*           | 0.15                                         | 4                         | 0.5-1000                                 | 106 s                 | 3                     | 75   |
| As(V)                                  | SPE/ HG-AFS <sup>h</sup>                        | Eggshell membrane                                           | Water                      | 33.3            | 0.001                                        | 2.1                       | -----                                    | 67                    | 200                   | 4    |
| As(V), As(III)                         | SPE/ FI-ICP-OES                                 | Anion exchange resin                                        | Water                      | -----           | As(V): 0.1<br>As(III): 0.1                   | 5<br>3                    | 0.5-2.0                                  | 15                    | 20                    | 76   |
| As(III)<br>As(V)                       | SPE/ ICP-MS <sup>i</sup>                        | APDC <sup>j</sup> -Carbon<br>nanofibers                     | Water                      | 33*             | As(III):0.0045<br>As(V):0.24                 | 1.9<br>2.6                | -----                                    | 100                   | 100                   | 77   |
| As(III), As(V)<br>converted to As(III) | SPE/ HG-AAS                                     | Alternaria solani<br>coated HP-2MG resin                    | Water, Food,<br>Human hair | 35              | 0.011                                        | < 7                       | -----                                    | 50                    | 250                   | 3    |
| As(III), As(V)<br>converted to As(III) | SPE/ HG-AAS                                     | Streptococcus<br>pyogenes immobilized<br>on Sepabeads SP 70 | Water and food             | 36              | 0.013                                        | < 8                       | 1-25                                     | 62.5                  | 250                   | 11   |

|                                                              |                                     |                                                            |                                       |              |                                  |            |                            |        |         |              |
|--------------------------------------------------------------|-------------------------------------|------------------------------------------------------------|---------------------------------------|--------------|----------------------------------|------------|----------------------------|--------|---------|--------------|
| As (III, V), Sb (II, IV),<br>As (V) converted to<br>As (III) | SPE/ ET-AAS <sup>k</sup>            | APDC-CNT <sup>l</sup>                                      | Water                                 | As (III):250 | 0.02                             | 3.5        | 0.03–0.6                   | 33     | 50      | 14           |
| As (III, V), Sb (II, IV),<br>Se (IV)                         | SPE/ ICP-MS                         | APDC-C18                                                   | water                                 | 50           | As (V): 0.09<br>As (III): 0.0012 | -----      | -----                      | -----  | -----   | 78           |
| As(III)                                                      | SPE/ GF-AAS <sup>m</sup>            | Immobilized<br>nanometer TiO <sub>2</sub>                  | Water                                 | 50           | 0.024                            | 4.8        | Up to 200                  | 50     | 50      | 79           |
| As(III), As(V)<br>converted to As(III)                       | On-line SPE/<br>FI-HG-AAS           | SiO <sub>2</sub> /ZrO <sub>2</sub>                         | Water                                 | 20*          | 0.05                             | < 8        | -----                      | 31     | 100     | 80           |
| As (III, V), Sb (III,V)                                      | Online-micro column<br>SPE/ ICP-OES | Modified mesoporous<br>TiO <sub>2</sub>                    | Water                                 | 10           | As (III):0.49<br>As (V): 0.53    | 1.5<br>3.9 | -----                      | ----   | ----    | 81           |
| As(III), As(V)                                               | SPE/ ICP-MS                         | Thiol- and amine-<br>bifunctionalized<br>mesoporous silica | Water                                 | ----         | As (III):0.025<br>As (V): 0.015  | 4.5<br>5.6 | -----                      | -----  | 10      | 18           |
| As(V), As(III)<br>converted to As(V)                         | D-μ-SPE/FI-HG-AAS                   | Carboxalated<br>nanoporous graphen                         | Water and<br>Human serum<br>and urine | 50.3<br>5.1  | 0.0021<br>0.0248                 | 3.1<br>2.6 | 0.01 – 0.65<br>0.11 – 6.60 | 3<br>1 | 50<br>5 | This<br>work |

<sup>a</sup> Preconcentration factor, <sup>b</sup> Detection limit, <sup>c</sup> Relative standard deviation, <sup>d</sup> Solid phase extraction, <sup>e</sup> Hydride generation atomic absorption spectrometry, <sup>f</sup> Cetyltrimethyl ammonium bromide immobilized on alumina-coated magnetite nanoparticles, <sup>g</sup> Inductively coupled plasma optical emission spectrometry, <sup>h</sup> Hydride generation atomic fluorescence spectrometry, <sup>i</sup> Inductively coupled plasma mass spectrometry, <sup>j</sup>Ammonium pyrrolidine dithiocarbamate, <sup>k</sup> Electrothermal atomic absorption spectrometry, <sup>l</sup> Carbon nanotubes, <sup>m</sup> Graphite furnace atomic absorption spectrometry, \* Enrichment factor

## References

63. K. Zhang, V. Dwivedi, C. Chi and J. Wu, *J. Hazard. Mater.*, 2010, **182**, 162.
64. G. Sheng, Y. Li, X. Yang, X. Ren, S. Yang, J. Hu and X. Wang, *RSC Adv.*, 2012, **2**, 12400.
65. X. Luo, C. Wang, L. Wang, F. Deng, S. Luo, X. Tu and C. Au, *Chem. Eng. J.*, 2013, **220**, 98.
66. C. Wang, H. Luo, Z. Zhang, Y. Wu, J. Zhang and S. Chen, *J. Hazard. Mater.*, 2014, **268**, 124.
67. X. Luo, C. Wang, S. Luo, R. Dong, X. Tu and G. Zeng, *Chem. Eng. J.*, 2012, **187**, 45.
68. T. Wang, W. Yang, T. Song, C. Li, L. Zhang, H. Wang and L. Chai, *RSC Adv.*, 2015, **5**, 50011.
69. Z. Liu, F.-S. Zhang and R. Sasai, *Chem. Eng. J.*, 2010, **160**, 57.
70. K. B. Payne and T. M. Abdel-Fattah, *J. Environ. Sci. Health*, 2005, **40**, 723.
71. K. Babaeivelni, A. P. Khodadoust and D. Bogdan, *J. Environ. Sci. Health, Part A*, 2014, **49**, 1462.
72. J. Mendoza-Barrón, A. Jacobo-Azuara, R. Leyva-Ramos, M. S. Berber-Mendoza, R. M. Guerrero-Coronado, L. Fuentes-Rubio and J. M. Martínez-Rosales, *Adsorption*, 2011, **17**, 489.
73. Z. Veličković, G. D. Vuković, A. D. Marinković, M.-S. Moldovan, A. A. Perić-Grujić, P. S. Uskoković and M. Đ. Ristić, *Chem. Eng. J.*, 2012, **181**, 174.
74. S. Bang, M. Patel, L. Lippincott and X. Meng, *Chemosphere*, 2005, **60**, 389.
75. C. Xiong, M. He and B. Hu, *Talanta*, 2008, **76**, 772.
76. K. Jitmanee, M. Oshima and S. Motomizu, *Talanta*, 2005, **66**, 529.
77. S. Chen, X. Zhan, D. Lu, C. Liu and L. Zhu, *Anal. Chim. Acta*, 2009, **634**, 192.

78. M. Mulugeta, G. Wibetoe, C. J. Engelsen and W. Lund, *J. Anal. At. Spectrom.*, 2010, **25**, 169.
79. P. Liang and R. Liu, *Anal. Chim. Acta*, 2007, **602**, 32.
80. G. T. Macarovscha, G. G. Bortoleto and S. Cadore, *Talanta*, 2007, **71**, 1150.
81. C. Huang, B. Hu and Z. Jiang, *Spectrochim. Acta, Part B*, 2007, **62**, 454.
